# Supplementary material for: Insights into a novel class of azobenzenes incorporating 4,6-O-protected sugars as photo-responsive organogelators
Source: RSC Adv. 2019 Dec 19;9(72):42219–27. doi: 10.1039/c9ra08033c (PMC9076560; doi:10.1039/c9ra08033c)

## **Insights into a novel class of azobenzene incorporated 4,6-*O*-protected sugar as photo-responsive organogelators**

***Bhavya P. V<sup>a</sup>, Vasanthan RabeccaJenifer<sup>a</sup>, Panneerselvam Muthuvel<sup>b</sup>, Thangamuthu Mohan Das<sup>a,b,\*</sup>***

*<sup>a</sup> Department of Chemistry, School of Basic and Applied sciences, Central University of Tamil Nadu (CUTN), Thiruvarur 610 005, INDIA*

*<sup>b</sup> Department of Organic Chemistry, University of Madras, Guindy Campus, Chennai - 600 025, INDIA*

---

\* Corresponding author. Tel.: +91 9965048959

E-mail addresses: tmohandas@cutn.ac.in, tmdas\_72@yahoo.com (T. Mohan Das).

---

## Supporting information

|                                                                  |     |
|------------------------------------------------------------------|-----|
| Figure S.1. HRMS spectrum of compound, <b>4</b>                  | S3  |
| Figure S.2. HRMS spectrum of compound, <b>5</b>                  | S4  |
| Figure S.3. HRMS spectrum of compound, <b>6</b>                  | S5  |
| Figure S.4. HRMS spectrum of compound, <b>8</b>                  | S6  |
| Figure S.5. HRMS spectrum of compound, <b>9</b>                  | S7  |
| Figure S.6. HRMS spectrum of compound, <b>10</b>                 | S8  |
| Figure S.7. HRMS spectrum of compound, <b>12</b>                 | S9  |
| Figure S.8. <sup>1</sup> H NMR spectrum of compound, <b>5</b>    | S10 |
| Figure S.9. <sup>13</sup> C NMR spectrum of compound, <b>5</b>   | S11 |
| Figure S.10. <sup>1</sup> H NMR spectrum of compound, <b>6</b>   | S12 |
| Figure S.11. <sup>13</sup> C NMR spectrum of compound, <b>6</b>  | S13 |
| Figure S.12. <sup>1</sup> H NMR spectrum of compound, <b>7</b>   | S14 |
| Figure S.13. <sup>13</sup> C NMR spectrum of compound, <b>7</b>  | S15 |
| Figure S.14. <sup>1</sup> H NMR spectrum of compound, <b>9</b>   | S16 |
| Figure S.15. <sup>13</sup> C NMR spectrum of compound, <b>9</b>  | S17 |
| Figure S.16. <sup>1</sup> H NMR spectrum of compound, <b>10</b>  | S18 |
| Figure S.17. <sup>13</sup> C NMR spectrum of compound, <b>10</b> | S19 |
| Figure S.18. <sup>1</sup> H NMR spectrum of compound, <b>11</b>  | S20 |
| Figure S.19. <sup>13</sup> C NMR spectrum of compound, <b>11</b> | S21 |
| Figure S.20. <sup>1</sup> H NMR spectrum of compound, <b>13</b>  | S22 |
| Figure S.21. <sup>13</sup> C NMR spectrum of compound, <b>13</b> | S23 |
| Figure S.22. <sup>1</sup> H NMR spectrum of compound, <b>14</b>  | S24 |
| Figure S.23. <sup>13</sup> C NMR spectrum of compound, <b>14</b> | S25 |
| Figure S.24. <sup>1</sup> H NMR spectrum of compound, <b>15</b>  | S26 |
| Figure S.25. <sup>13</sup> C NMR spectrum of compound, <b>15</b> | S27 |

**Figure S1. HRMS spectrum of compound 4**

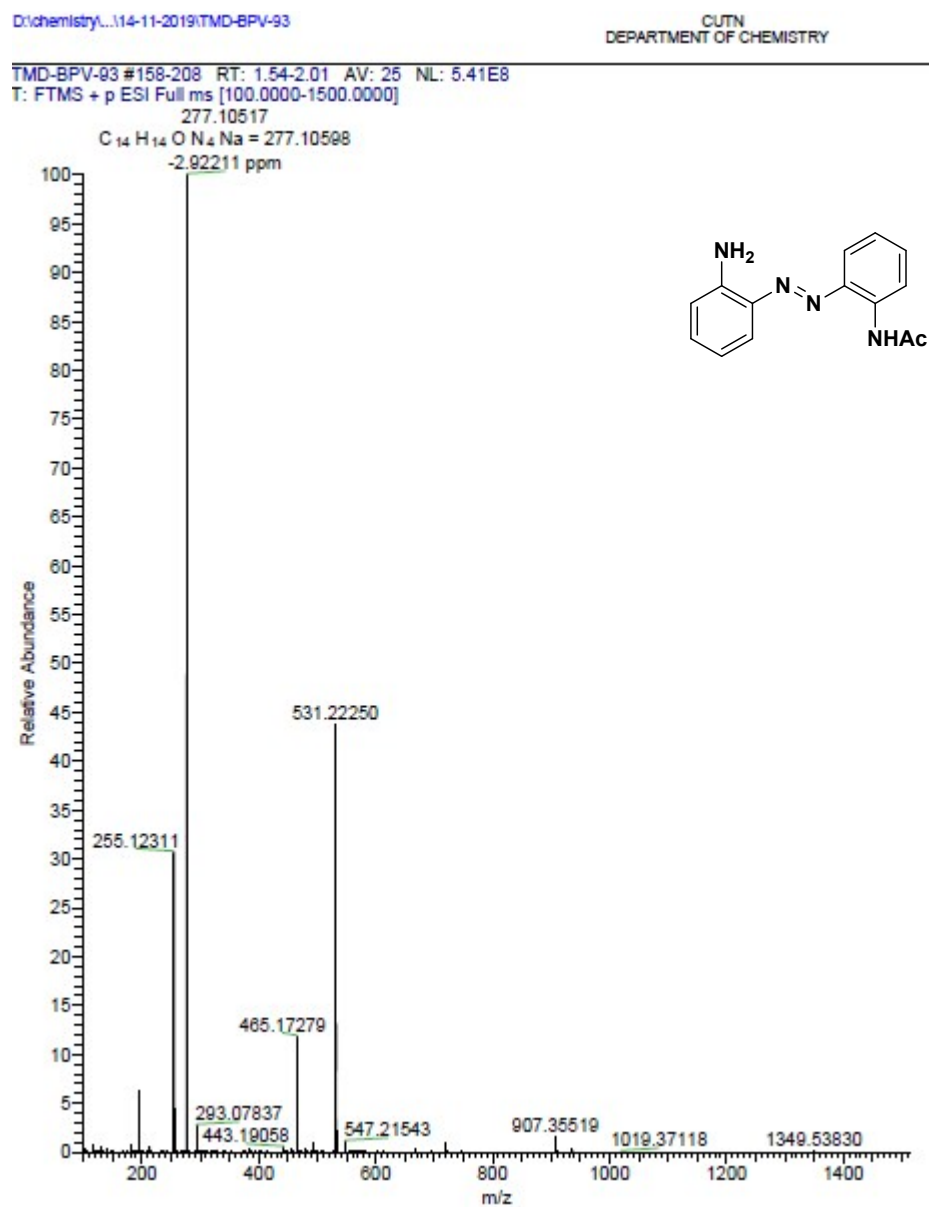

Figure S2. HRMS spectrum of compound, 5

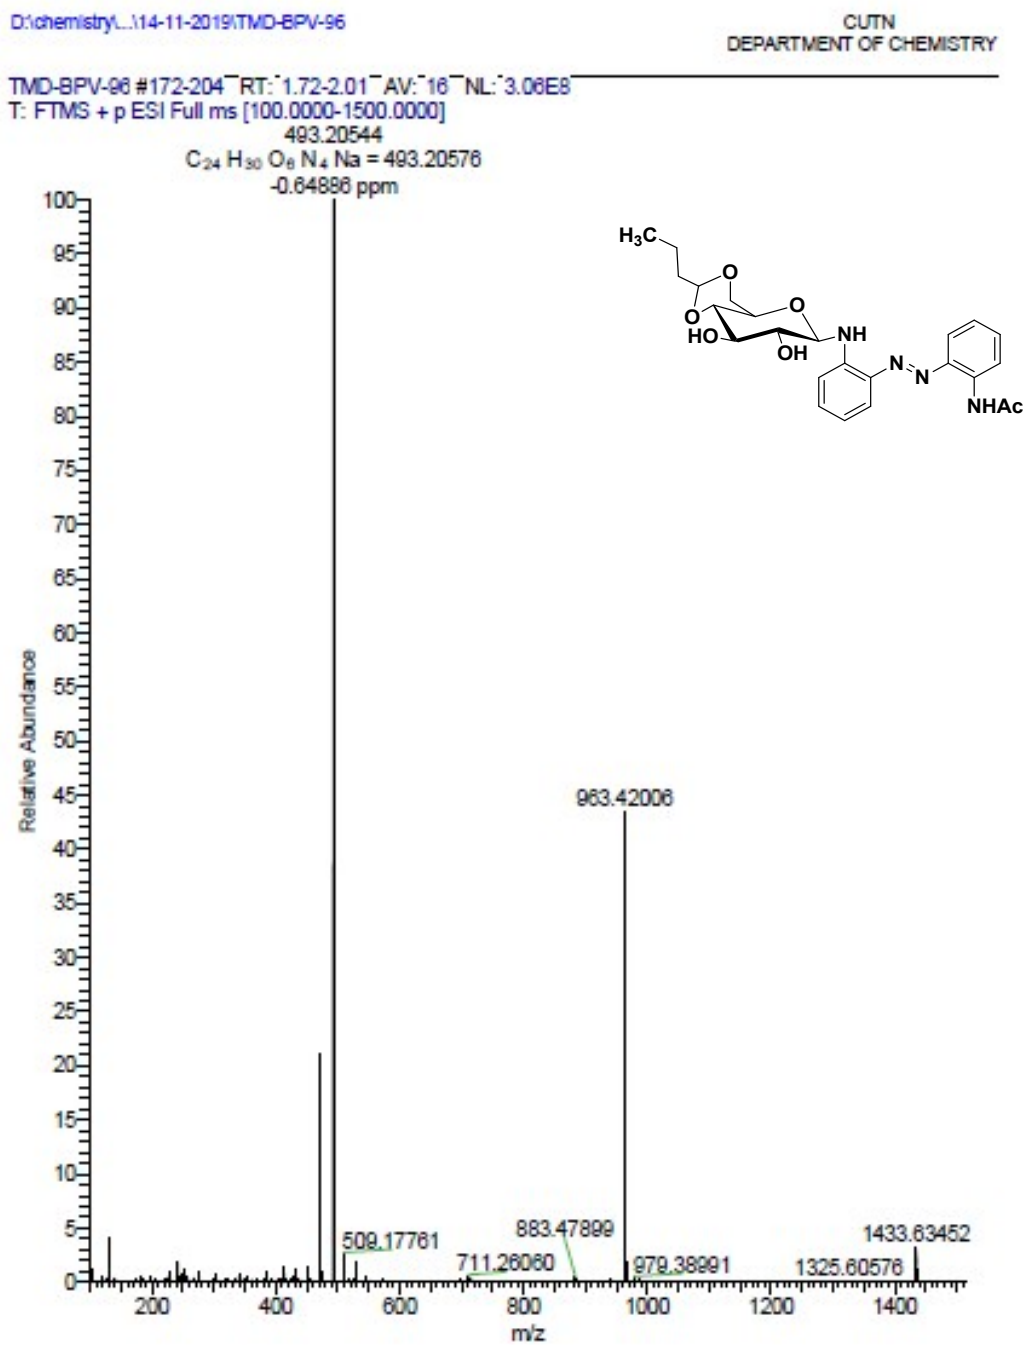

Figure S3. HRMS spectrum of compound, 6

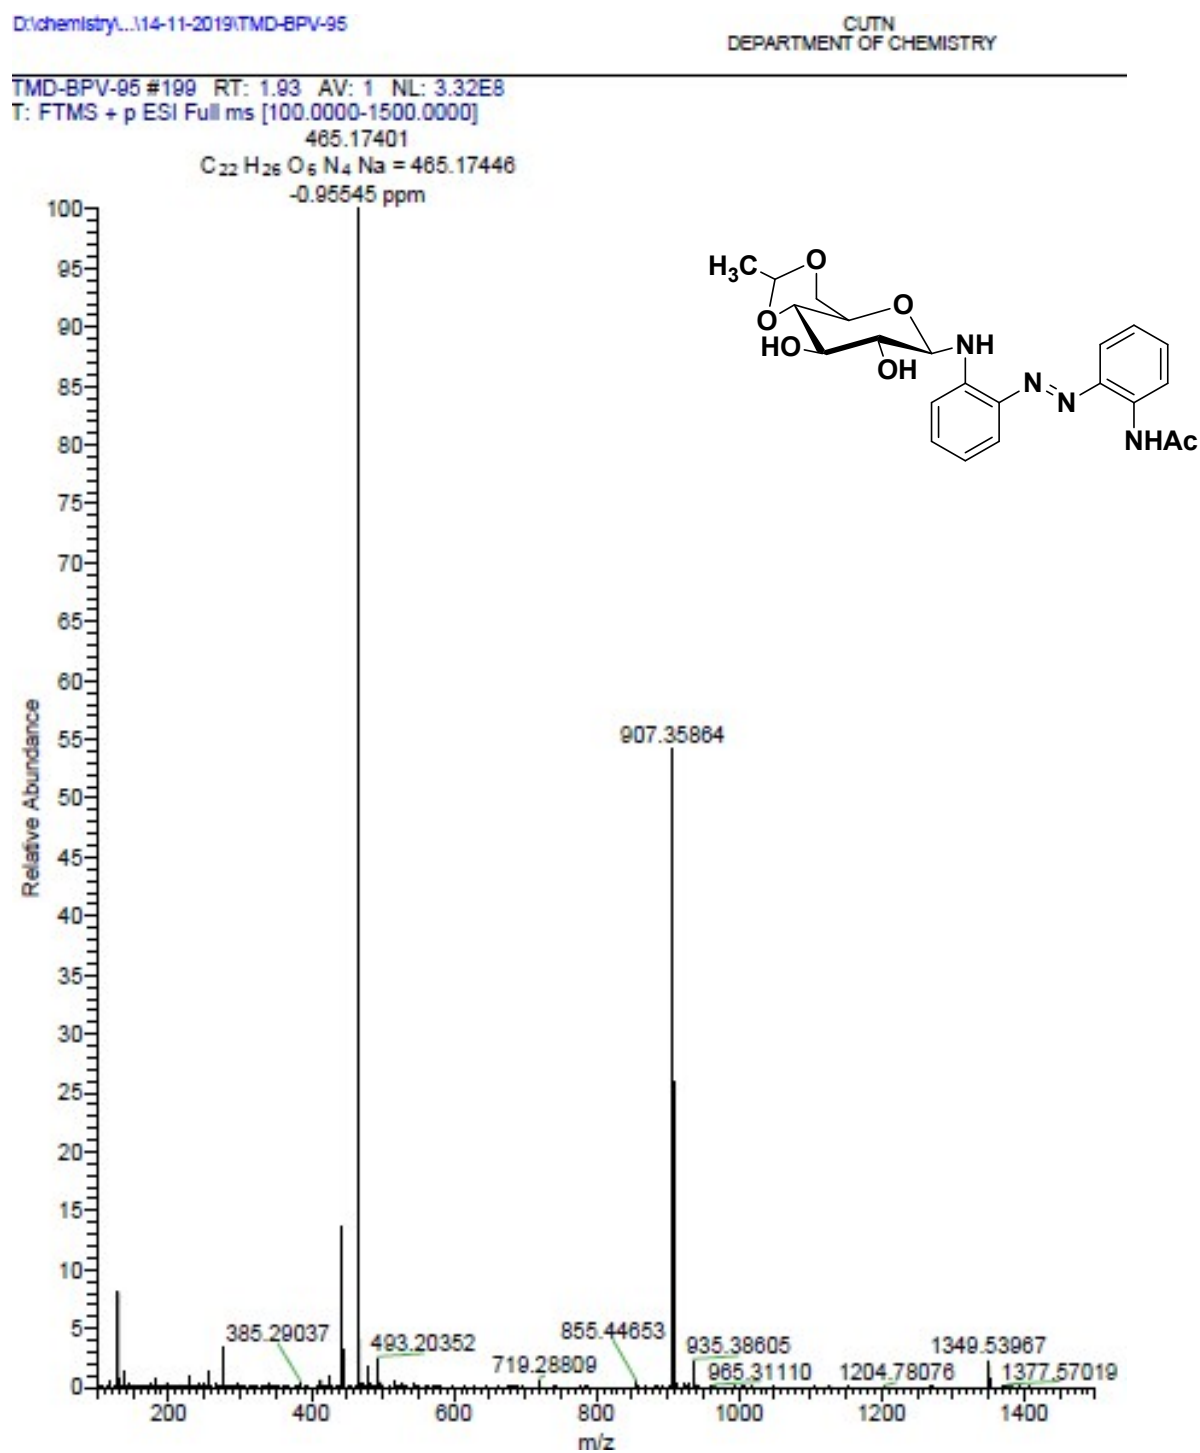

**Figure S4. HRMS spectrum of compound 8**

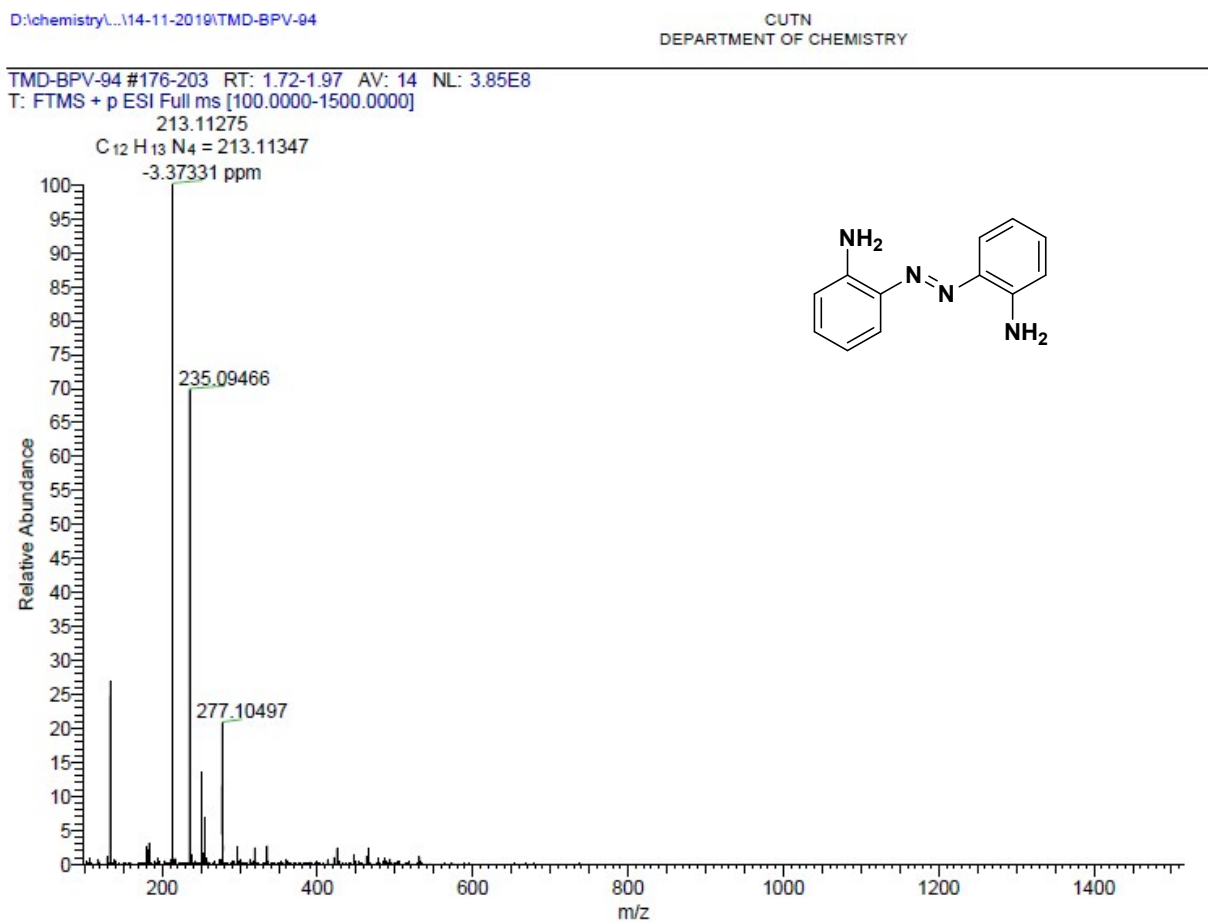

Figure S5. HRMS spectrum of compound,9

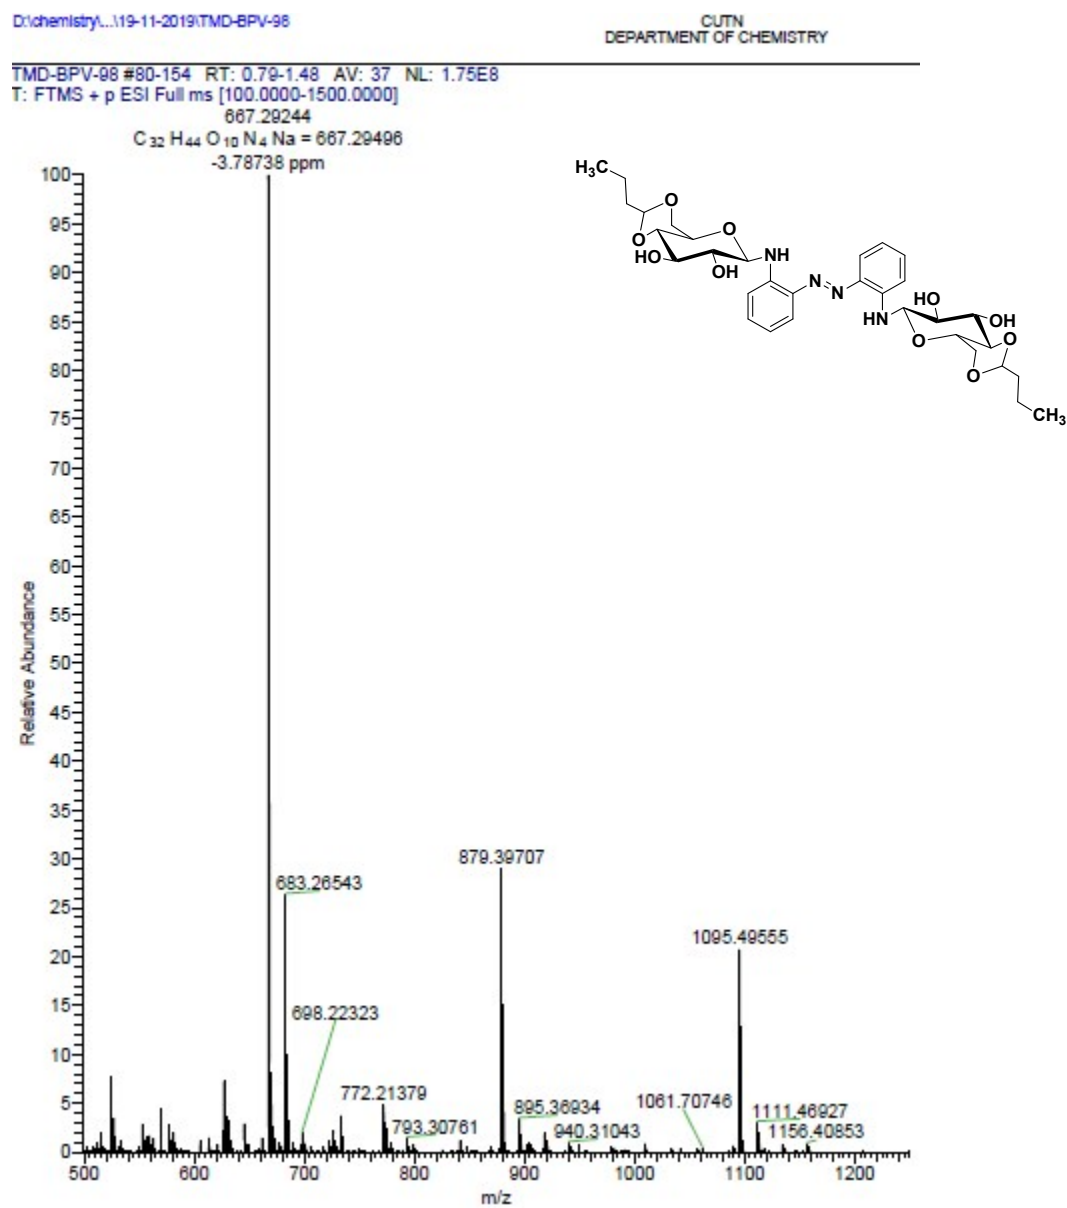

**Figure S6. HRMS spectrum of compound,10**

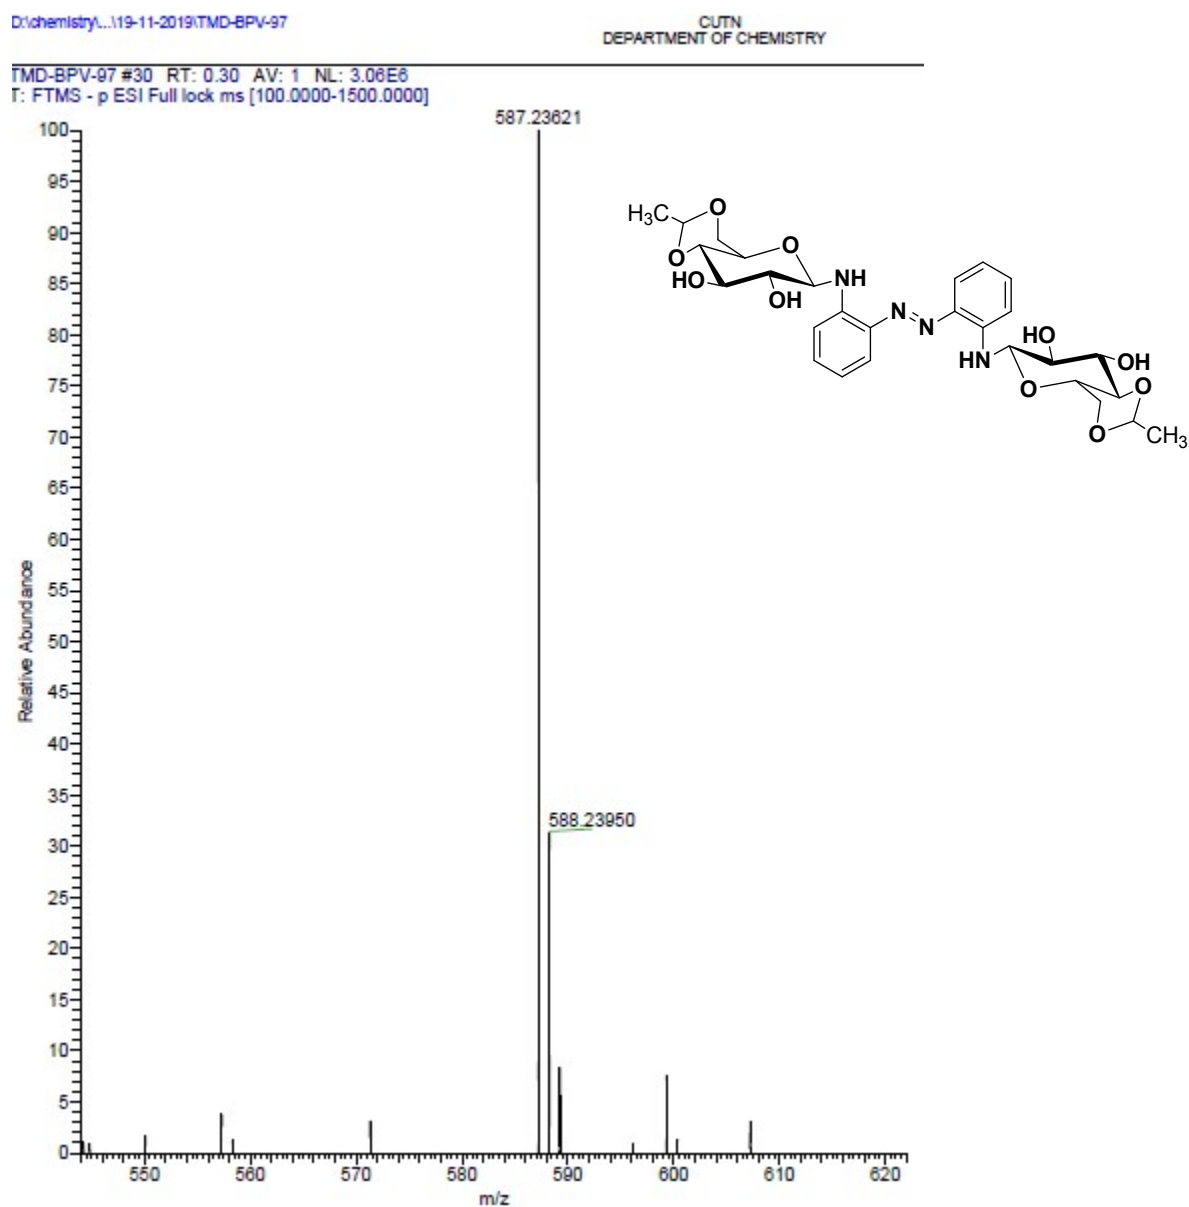

Figure S7. HRMS spectrum of compound, 12

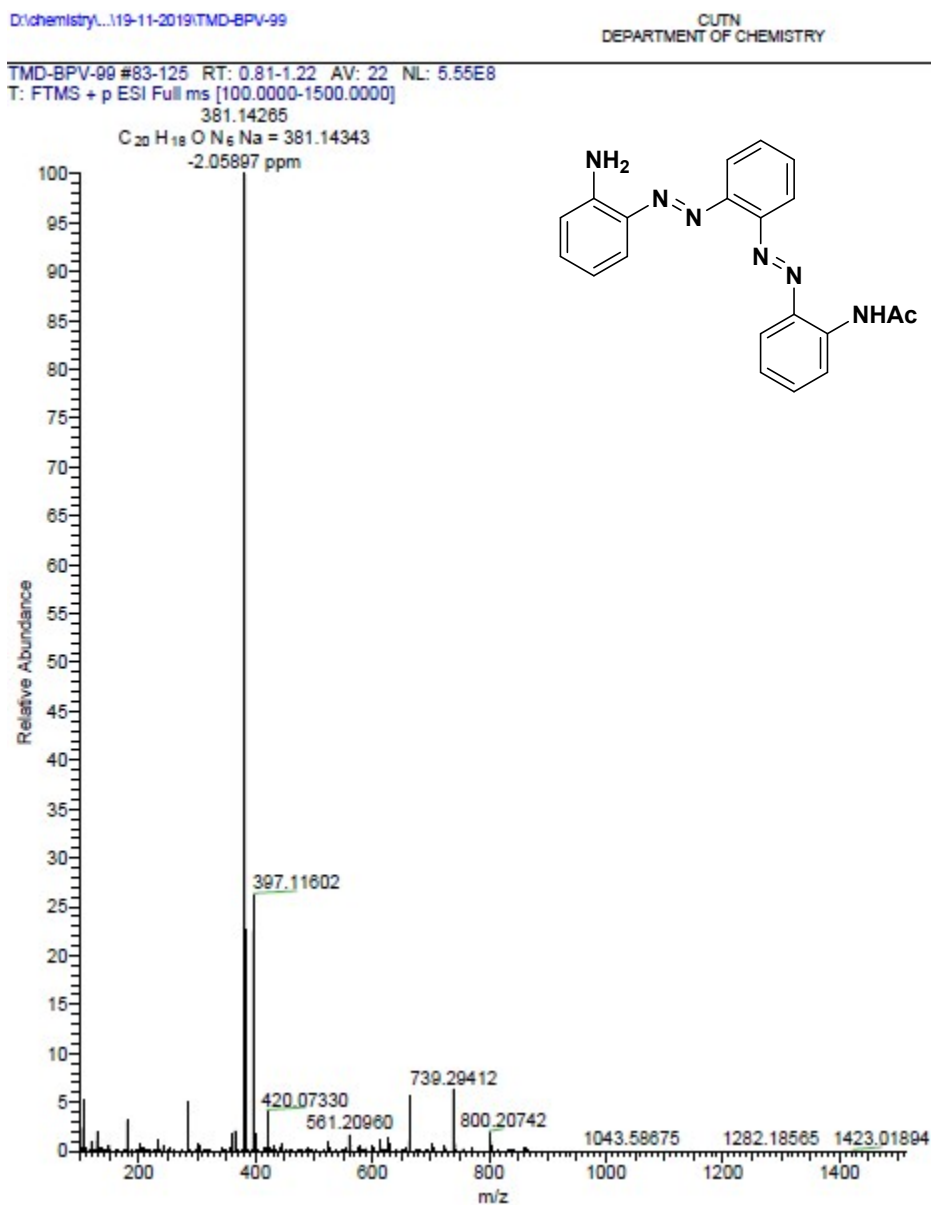

**Figure S8.  $^1\text{H}$  NMR Spectrum of compound, 5 ( $\text{CDCl}_3$  (0.6mL)+DMSO- $\text{d}_6$  (0.1mL), 300MHz)**

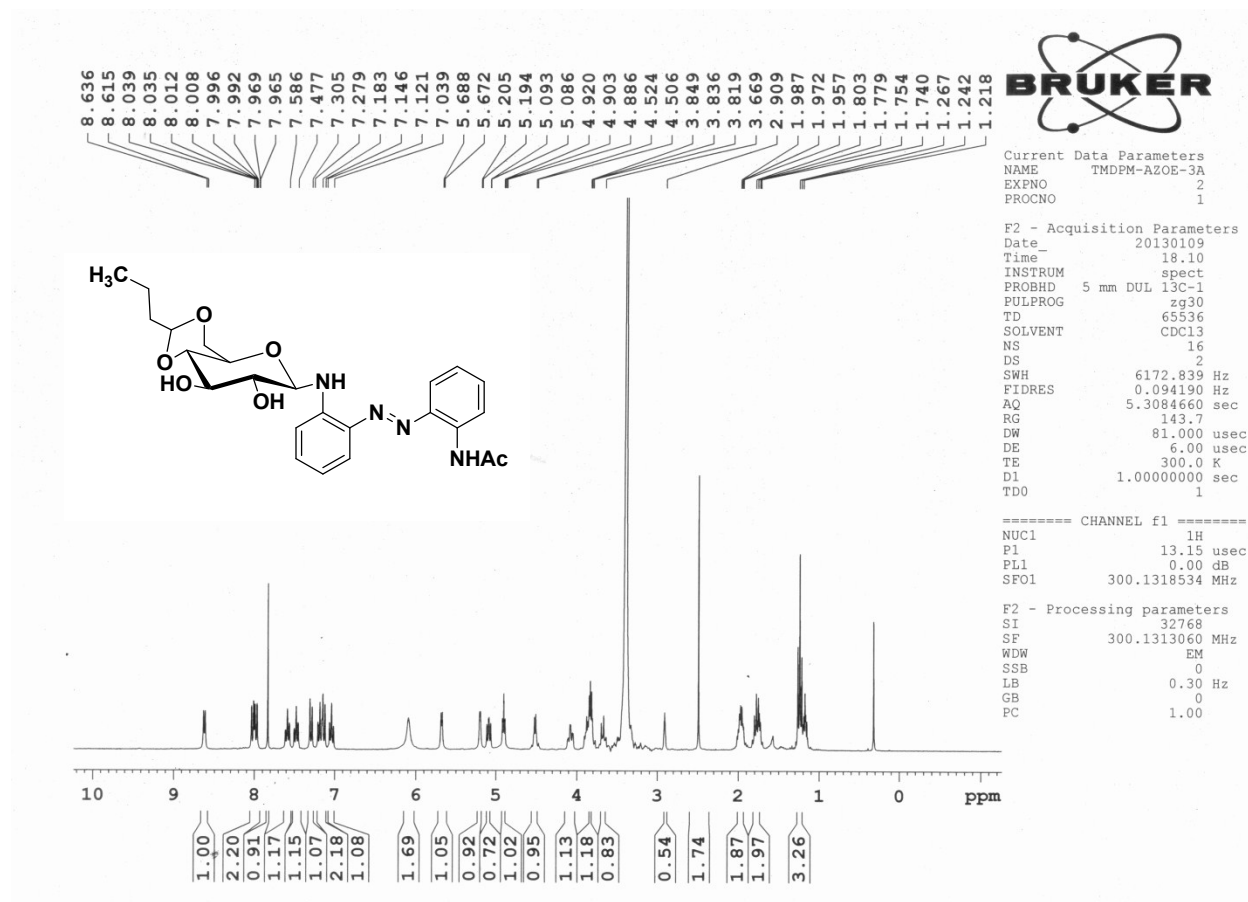

**Figure S9.  $^{13}\text{C}$  NMR Spectrum of compound, 5 ( $\text{CDCl}_3(0.6\text{mL}) + \text{DMSO}-d_6(0.1\text{mL})$ , 75MHz)**

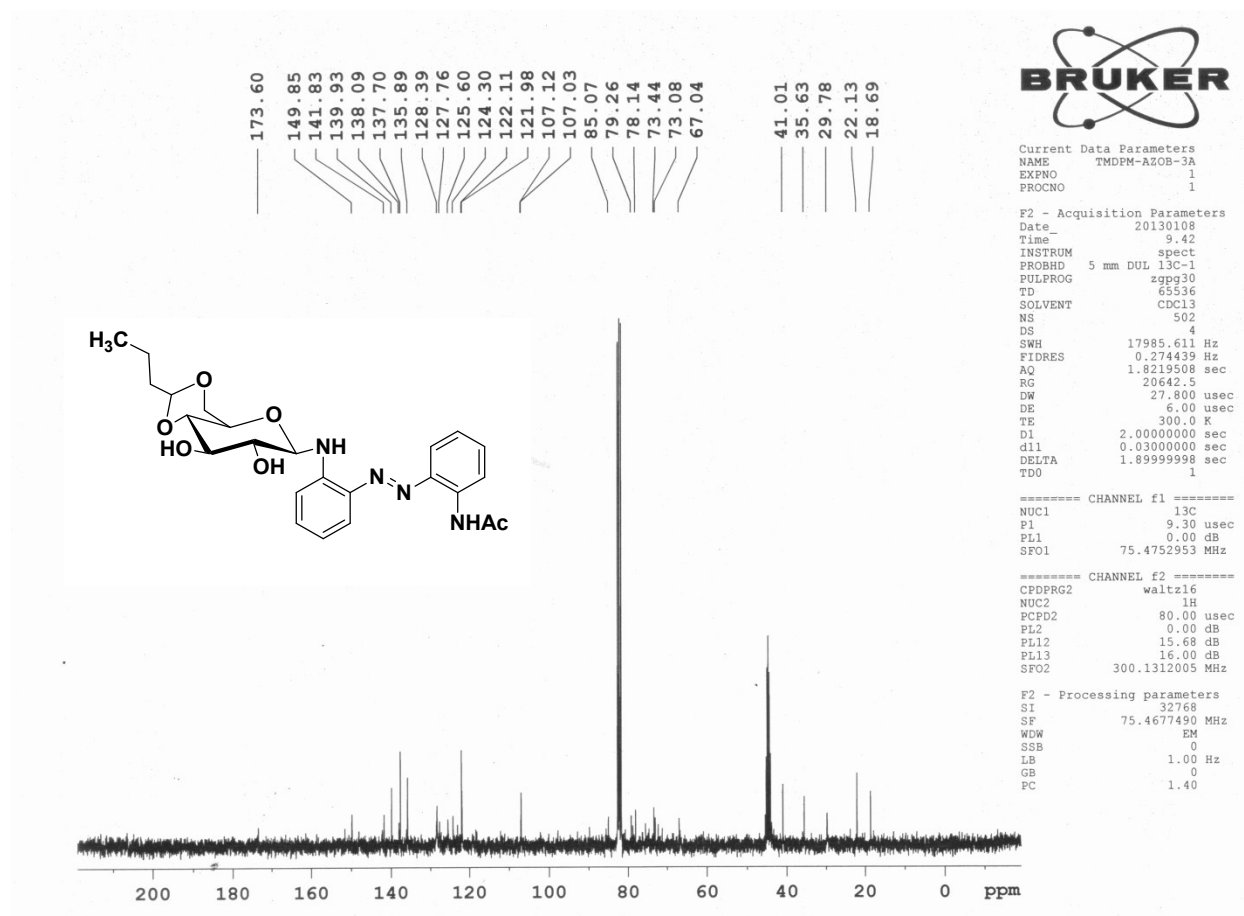

**Figure S10.  $^1\text{H}$  NMR Spectrum of compound, 6 ( $\text{CDCl}_3(0.6\text{mL}) + \text{DMSO}-d_6(0.1\text{mL})$ , 300MHz)**

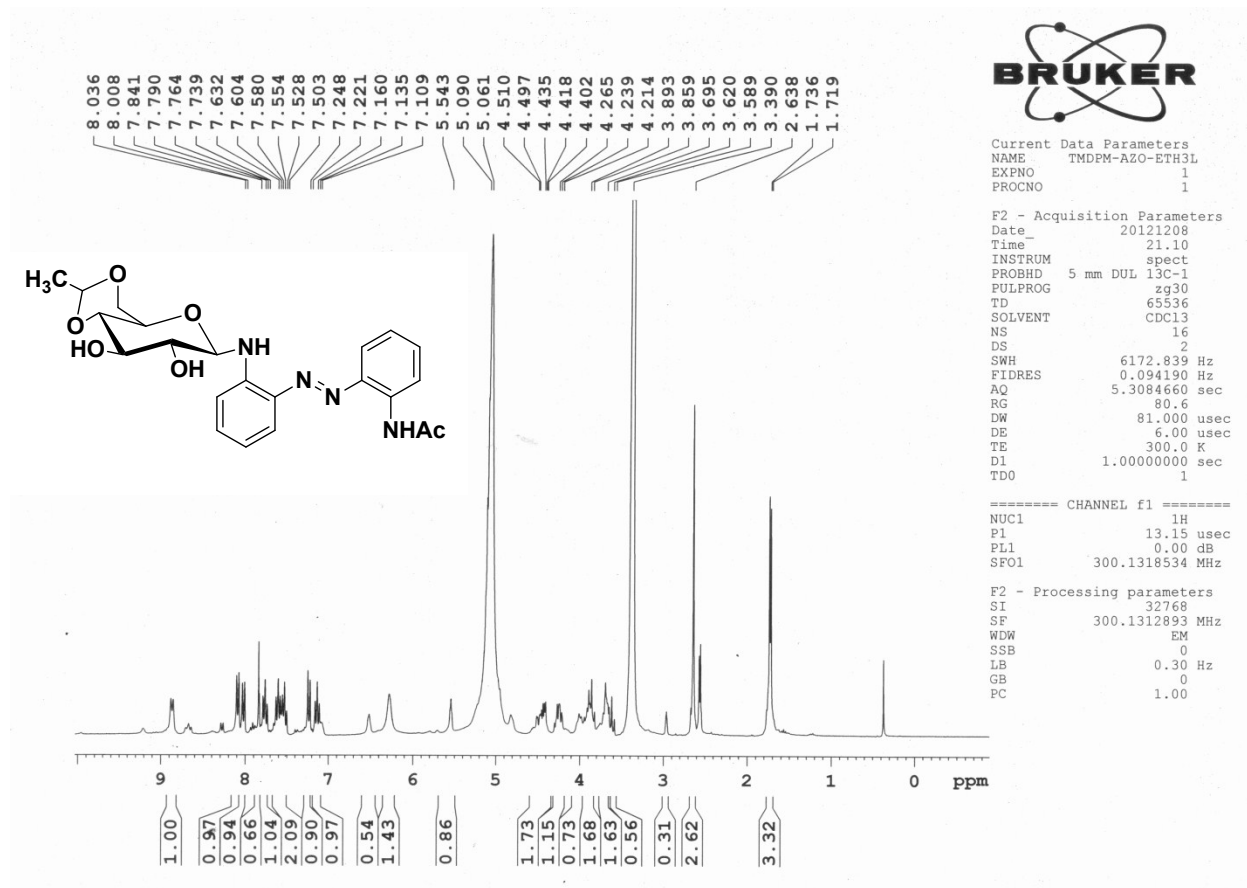

**Figure S11.  $^{13}\text{C}$  NMR Spectrum of compound 6 ( $\text{CDCl}_3(0.6\text{mL}) + \text{DMSO}-d_6(0.1\text{mL})$ , 75MHz)**

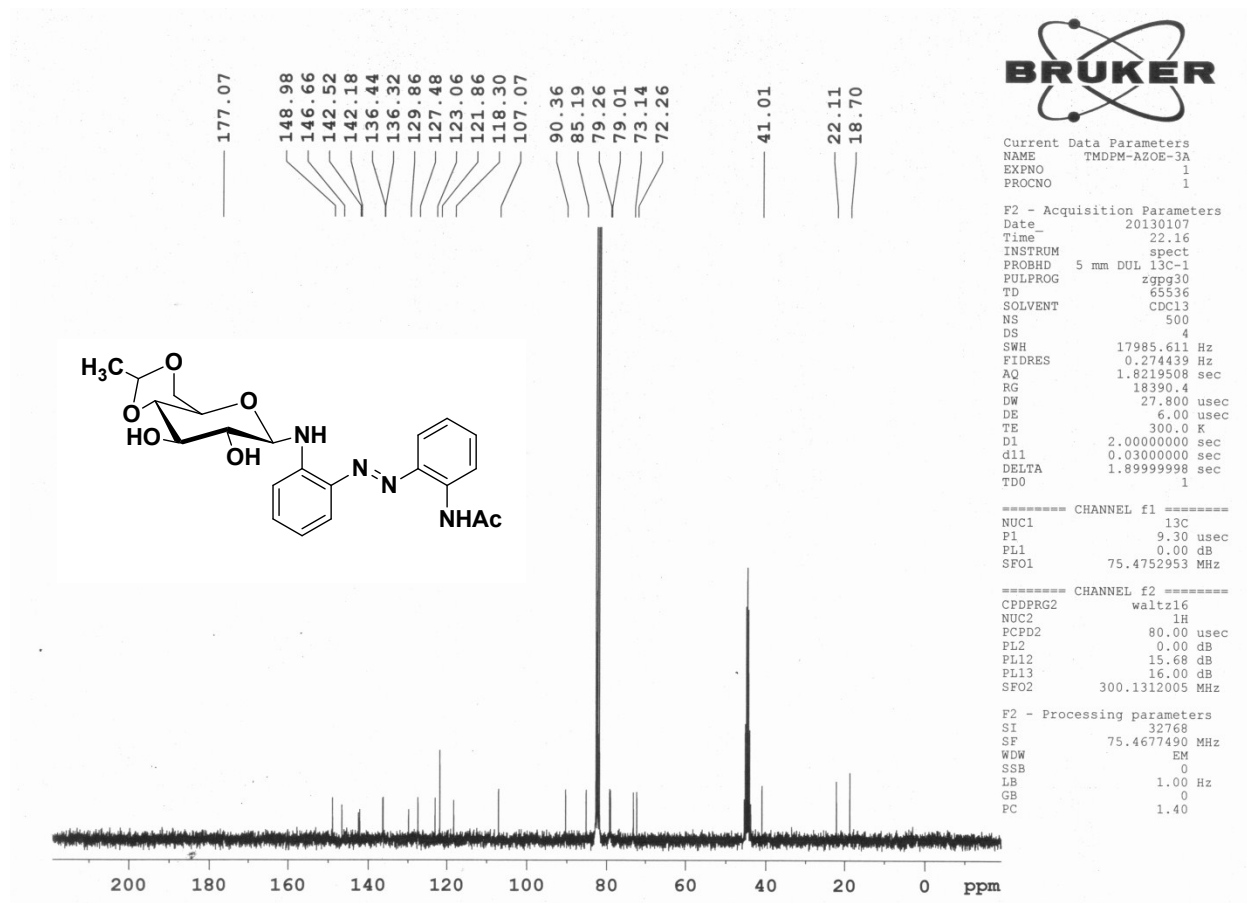

**Figure S12.  $^1\text{H}$  NMR Spectrum of compound, 7 ( $\text{CDCl}_3(0.6\text{mL}) + \text{DMSO-}d_6(0.1\text{mL})$ , 300MHz)**

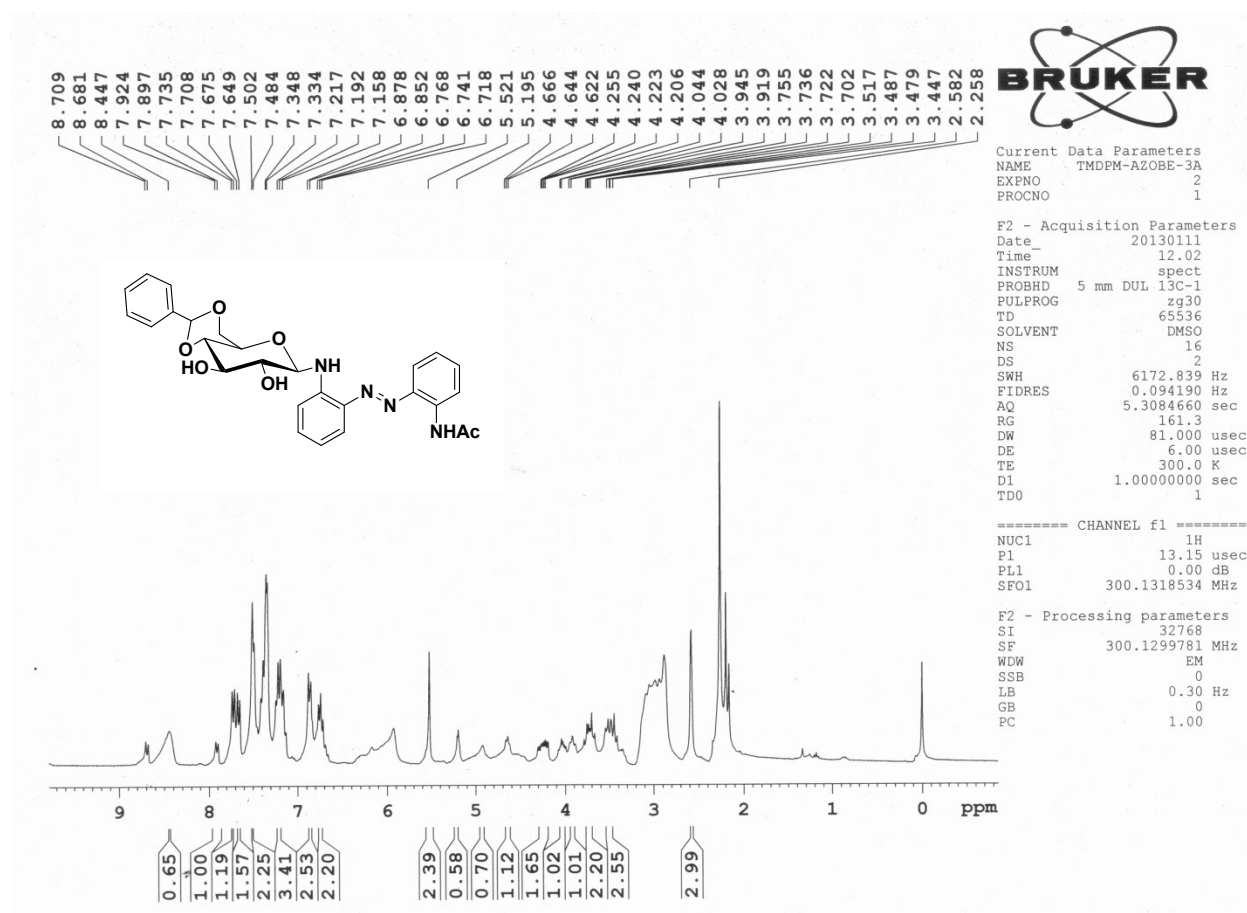

**Figure S13.  $^{13}\text{C}$  NMR Spectrum of compound 7 ( $\text{CDCl}_3(0.6\text{mL}) + \text{DMSO-d}_6(0.1\text{mL})$ , 75MHz)**

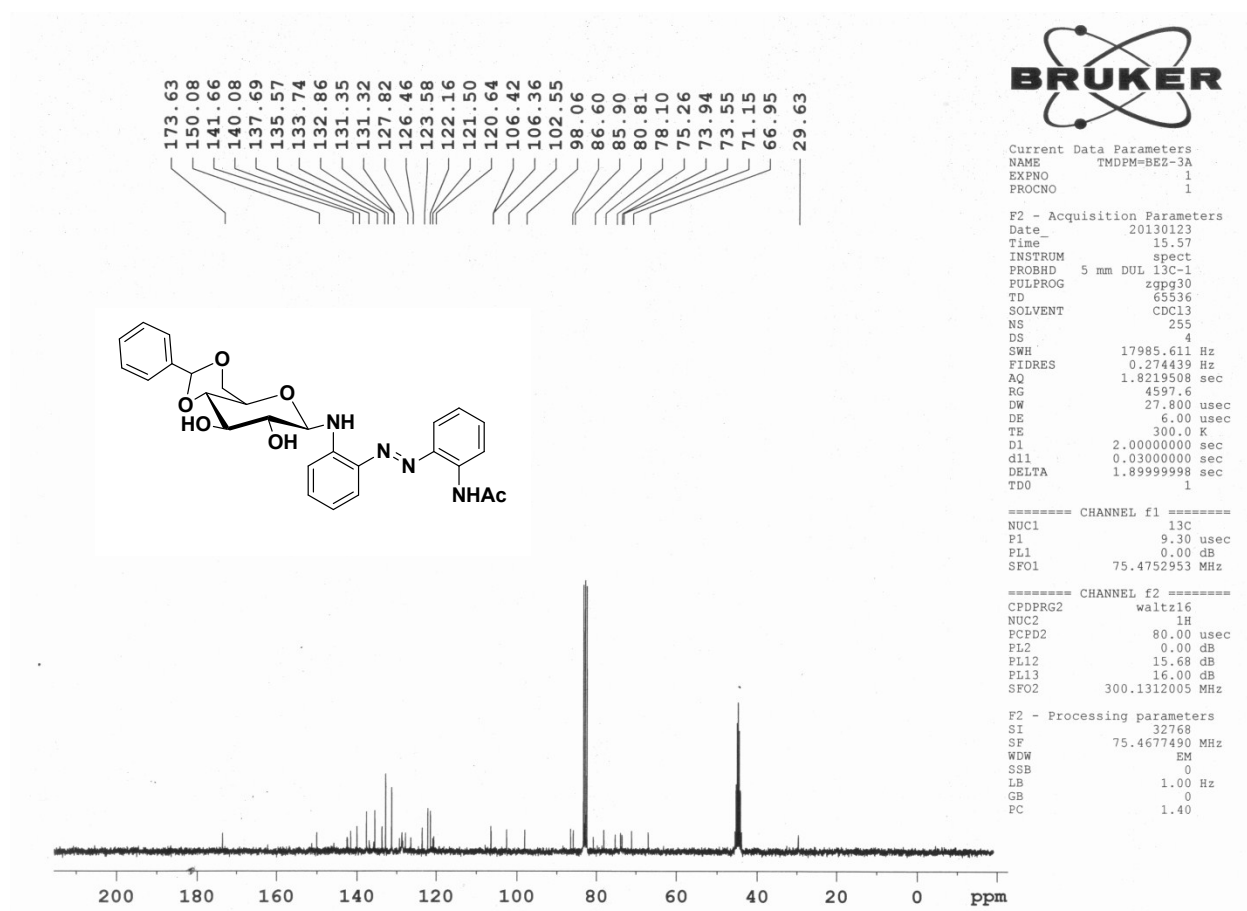

**Figure S14.  $^1\text{H}$  NMR Spectrum of compound, 9 ( $\text{CDCl}_3(0.6\text{mL}) + \text{DMSO-}d_6(0.1\text{mL})$ , 300MHz)**

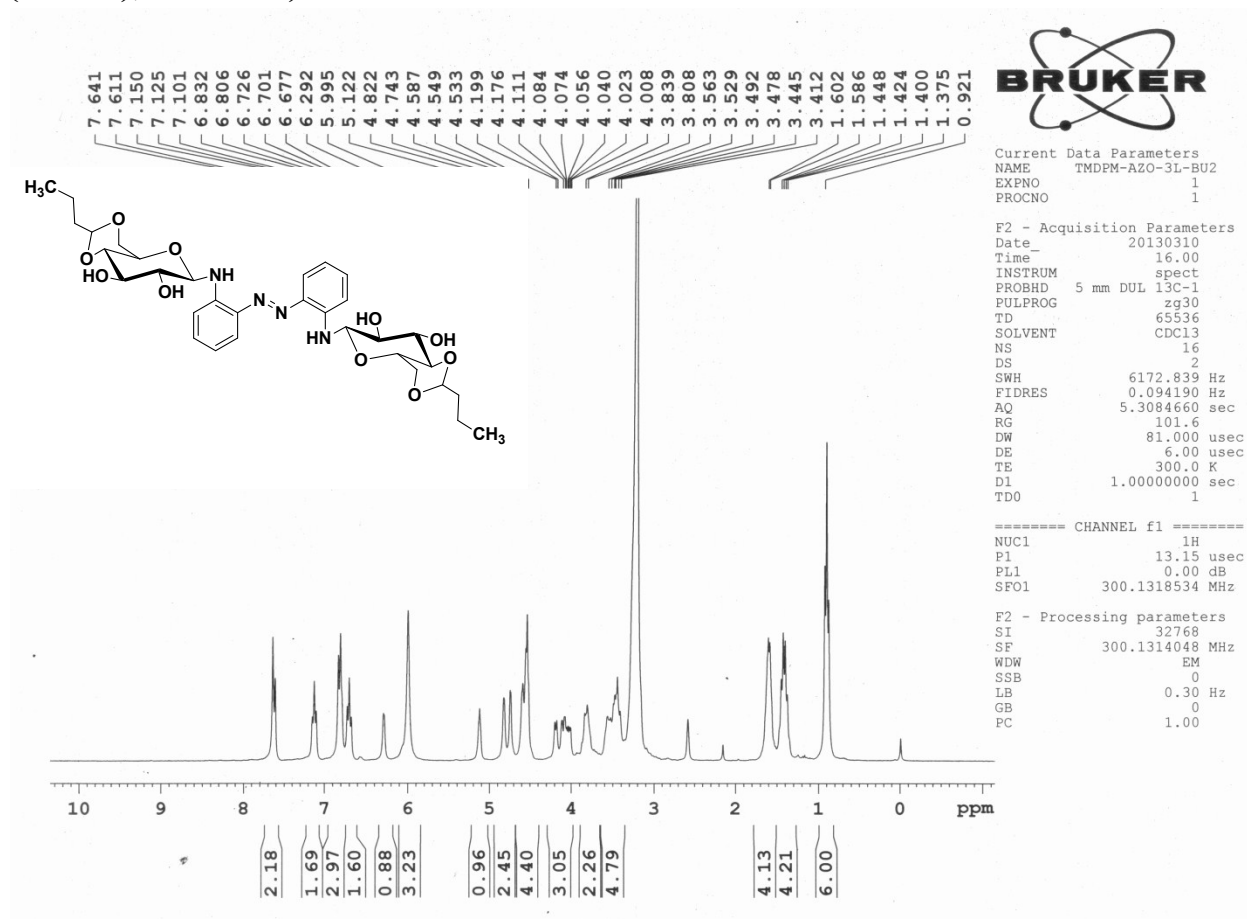

**Figure S15.  $^{13}\text{C}$  NMR Spectrum of compound 9 ( $\text{CDCl}_3(0.6\text{mL}) + \text{DMSO}-d_6(0.1\text{mL})$ , 75MHz)**

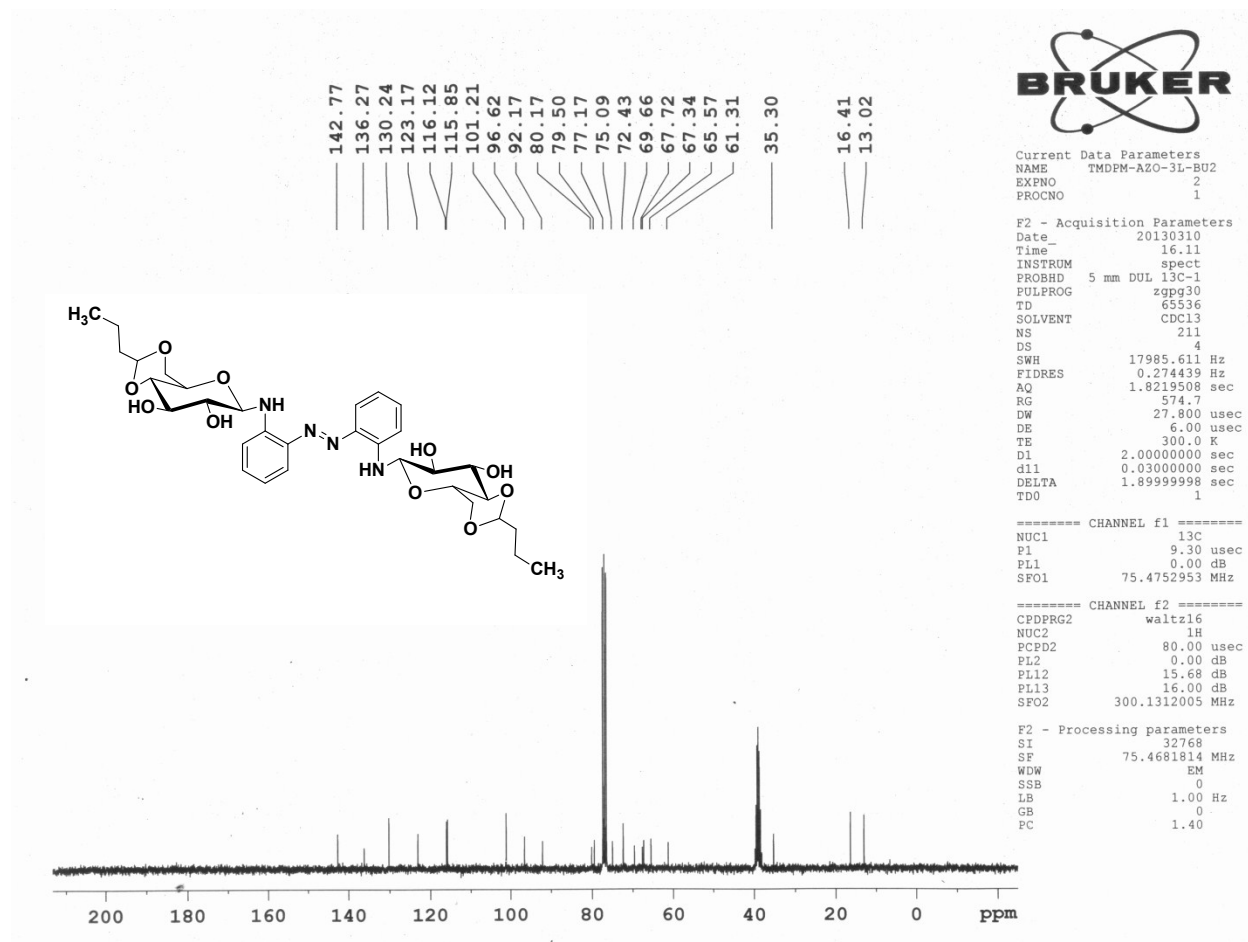

**Figure S16.  $^1\text{H}$  NMR Spectrum of compound, 10 ( $\text{CDCl}_3(0.6\text{mL}) + \text{DMSO-}d_6(0.1\text{mL})$ , 300MHz)**

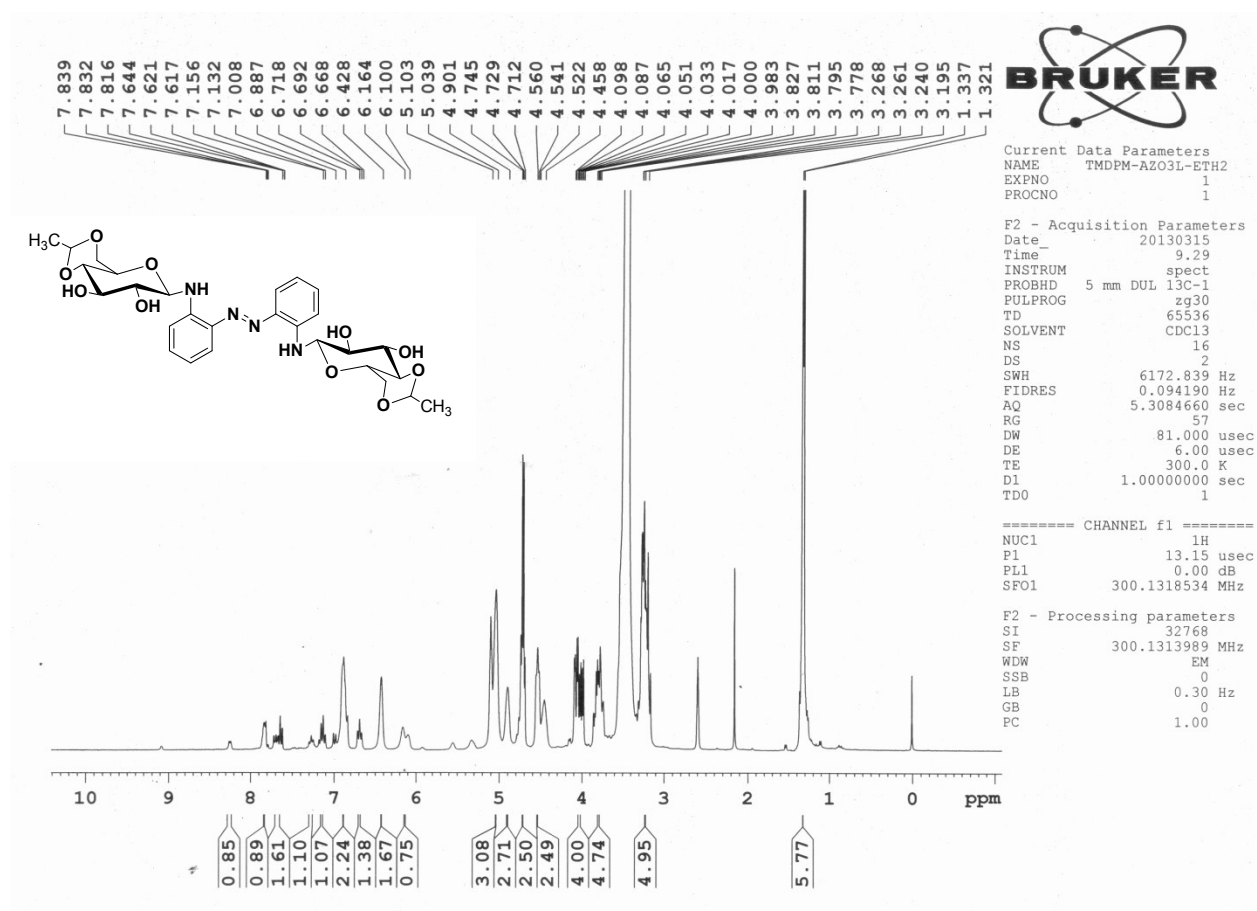

**Figure S17.  $^{13}\text{C}$  NMR Spectrum of compound, 10 ( $\text{CDCl}_3$ (0.6mL) +DMSO-  $\text{d}_6$  (0.1mL), 75MHz)**

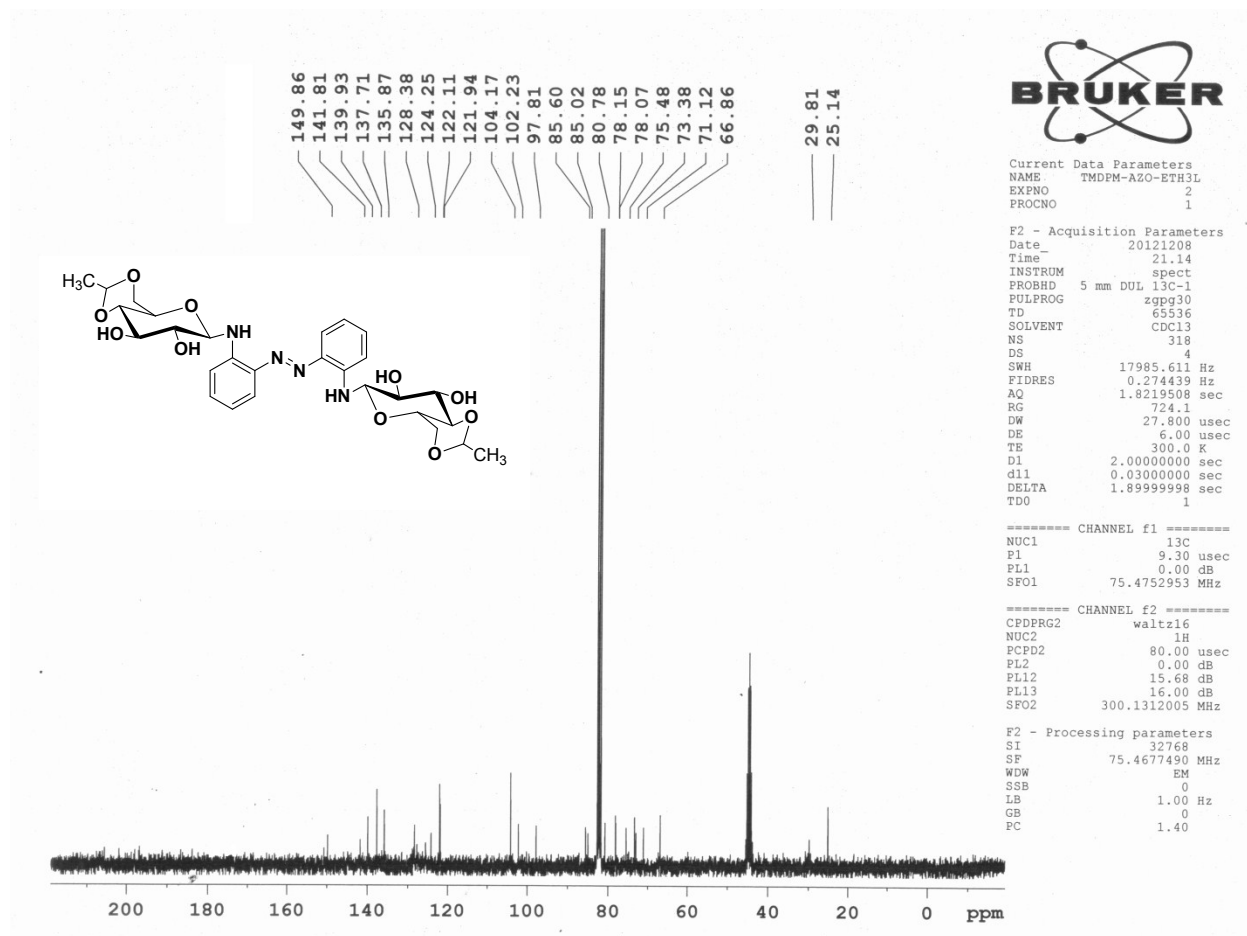

**BRUKER**

Current Data Parameters  
NAME TMDPM-AZO-3L-BENZ  
EXNO 1  
PROCNO 1

F2 - Acquisition Parameters  
Date 20130316  
Time 21.31  
INSTRUM spect  
PROBHD 5 mm DUL 13C-1  
PULPROG zg30  
TD 65536  
SOLVENT CDCl3  
NS 16  
DS 2  
SWH 6172.839 Hz  
FIDRES 0.094190 Hz  
AQ 5.3084660 sec  
RG 80.6  
DW 81.000 usec  
DE 6.00 usec  
TE 300.0 K  
D1 1.00000000 sec  
TDO 1

===== CHANNEL f1 =====  
NUC1 1H  
P1 13.15 usec  
PL1 0.00 dB  
SFO1 300.1318534 MHz

F2 - Processing parameters  
SI 32768  
SF 300.1314064 MHz  
WDW EM  
SSB 0  
LB 0.30 Hz  
GB 0  
PC 1.00

7.601  
7.480  
7.467  
7.339  
7.327  
7.319  
6.936  
6.834  
6.807  
6.688  
6.450  
6.053  
5.152  
5.102  
4.973  
4.605  
4.594  
4.386  
4.274  
4.259  
4.239  
4.225  
4.209  
4.192  
4.175  
4.159  
4.029  
4.013  
3.996  
3.980  
3.963  
3.947  
3.896  
3.868  
3.834  
3.761  
3.728  
3.714  
3.695  
3.680  
3.645  
3.634  
3.480  
3.451

1.93  
1.00  
4.72  
4.41  
0.85  
2.23  
0.81  
0.78  
1.48  
0.98  
0.68  
1.97  
0.63  
2.32  
1.11  
0.85  
5.54  
1.18  
1.46  
6.02  
2.38

ppm

Oc1ccc(cc1)/N=N/c2ccccc2N[C@@H]3O[C@H](CO[C@@H]4O[C@H](c5ccccc5)O[C@H]4O)[C@H](O)[C@H](O)[C@H]3O

**Figure S19.  $^{13}\text{C}$  NMR Spectrum of compound 11 ( $\text{CDCl}_3(0.6\text{mL}) + \text{DMSO}-d_6(0.1\text{mL})$ , 75MHz)**

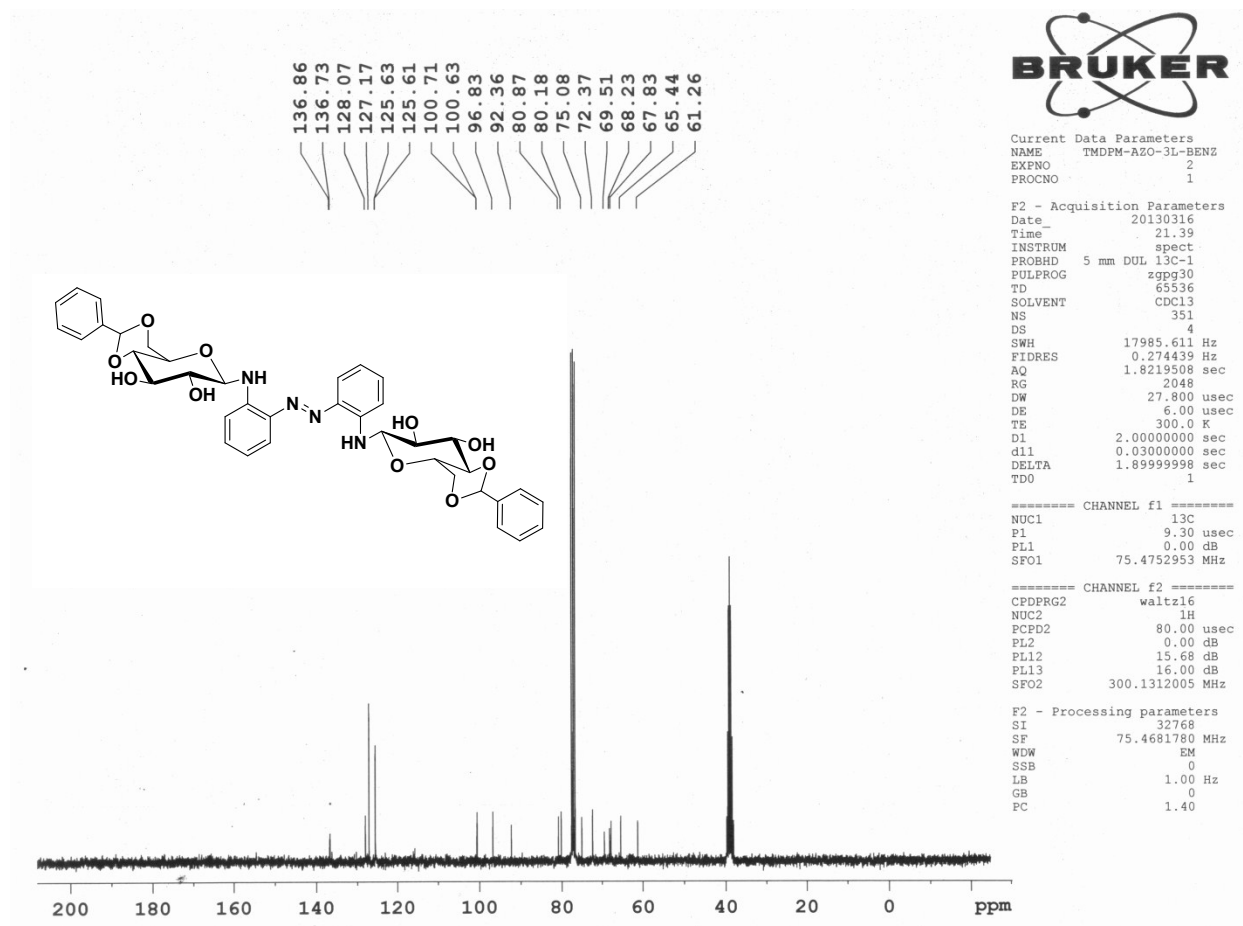

**Figure S20.  $^1\text{H}$  NMR Spectrum of compound, 13 ( $\text{CDCl}_3(0.6\text{mL}) + \text{DMSO-}d_6(0.1\text{mL})$ , 300MHz)**

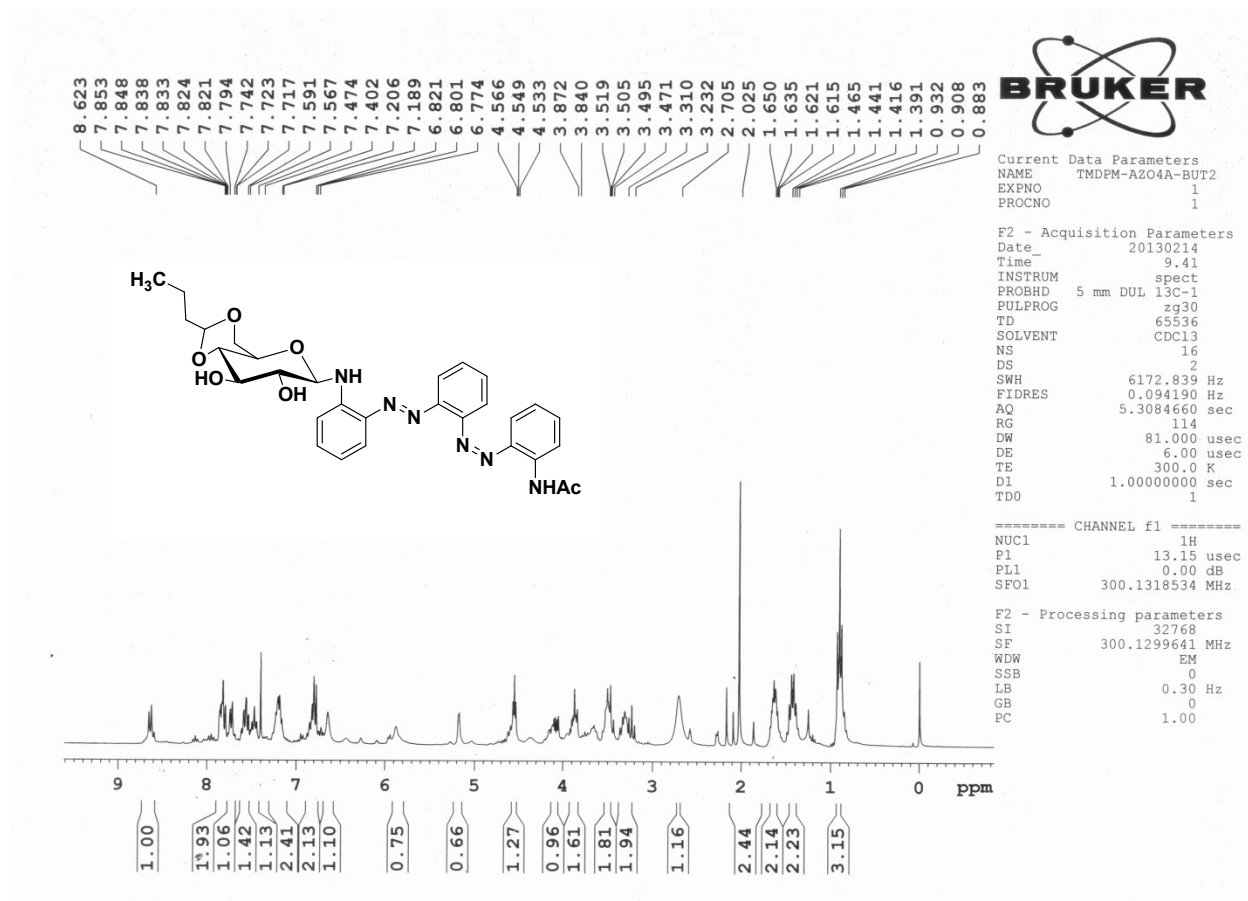

**Chemical Structure:** A substituted sugar derivative. The sugar ring has a methyl group (H<sub>3</sub>C) at C4, a hydroxyl group (OH) at C1, and a complex side chain at C2. The side chain consists of an azo group (-N=N-) linked to a phenyl ring, which is further linked to another azo group (-N=N-) linked to a phenyl ring with an acetamido group (-NHAc).

**13C NMR Spectrum:** The spectrum shows peaks from 13.55 to 168.66 ppm. The peaks are labeled with their chemical shifts: 168.66, 147.26, 147.12, 142.15, 139.31, 137.19, 135.71, 132.59, 132.31, 131.18, 130.35, 129.66, 123.03, 120.18, 118.02, 116.88, 116.79, 116.48, 101.94, 97.07, 92.64, 80.46, 73.05, 70.67, 68.33, 61.95, 35.91, 24.62, 17.01, 13.55.

**Current Data Parameters:**

| NAME   | VALUE |
|--------|-------|
| EXPNO  | 2     |
| PROCNO | 1     |

**F2 - Acquisition Parameters:**

| NAME    | VALUE          |
|---------|----------------|
| Date_   | 20130214       |
| Time    | 10.14          |
| INSTRUM | spect          |
| PROBHD  | 5 mm DUL 13C-1 |
| PULPROG | zgpg30         |
| TD      | 65536          |
| SOLVENT | CDCl3          |
| NS      | 500            |
| DS      | 4              |
| SWH     | 17985.611 Hz   |
| FIDRES  | 0.274439 Hz    |
| AQ      | 1.8219508 sec  |
| RG      | 1149.4         |
| DW      | 27.800 usec    |
| DE      | 6.00 usec      |
| TE      | 300.0 K        |
| D1      | 2.00000000 sec |
| d11     | 0.03000000 sec |
| DELTA   | 1.89999998 sec |
| TD0     | 1              |

**Channel f1:**

| NAME | VALUE          |
|------|----------------|
| NUC1 | 13C            |
| P1   | 9.30 usec      |
| PL1  | 0.00 dB        |
| SFO1 | 75.4752953 MHz |

**Channel f2:**

| NAME    | VALUE           |
|---------|-----------------|
| CPDPRG2 | waltz16         |
| NUC2    | 1H              |
| PCPD2   | 80.00 usec      |
| PL2     | 0.00 dB         |
| PL12    | 15.68 dB        |
| PL13    | 16.00 dB        |
| SFO2    | 300.1312005 MHz |

**F2 - Processing parameters:**

| NAME | VALUE          |
|------|----------------|
| SI   | 32768          |
| SF   | 75.4677717 MHz |
| WDW  | EM             |
| SSB  | 0              |
| LB   | 1.00 Hz        |
| GB   | 0              |
| PC   | 1.40           |

**Figure S22.  $^1\text{H}$  NMR Spectrum of compound 14 ( $\text{CDCl}_3(0.6\text{mL}) + \text{DMSO}-d_6(0.1\text{mL})$ , 300MHz)**

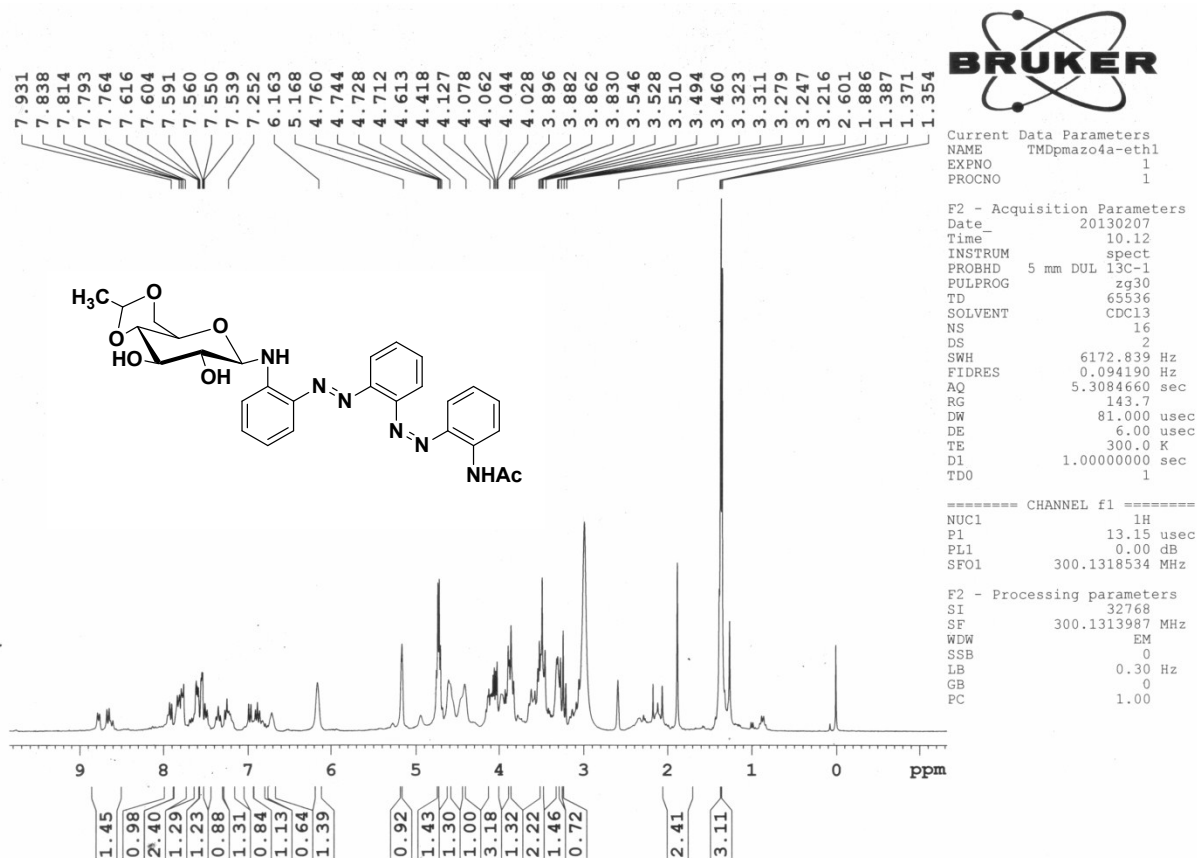

**Figure S23.  $^{13}\text{C}$  NMR Spectrum of compound 14 ( $\text{CDCl}_3(0.6\text{mL}) + \text{DMSO}-d_6(0.1\text{mL})$ , 75MHz)**

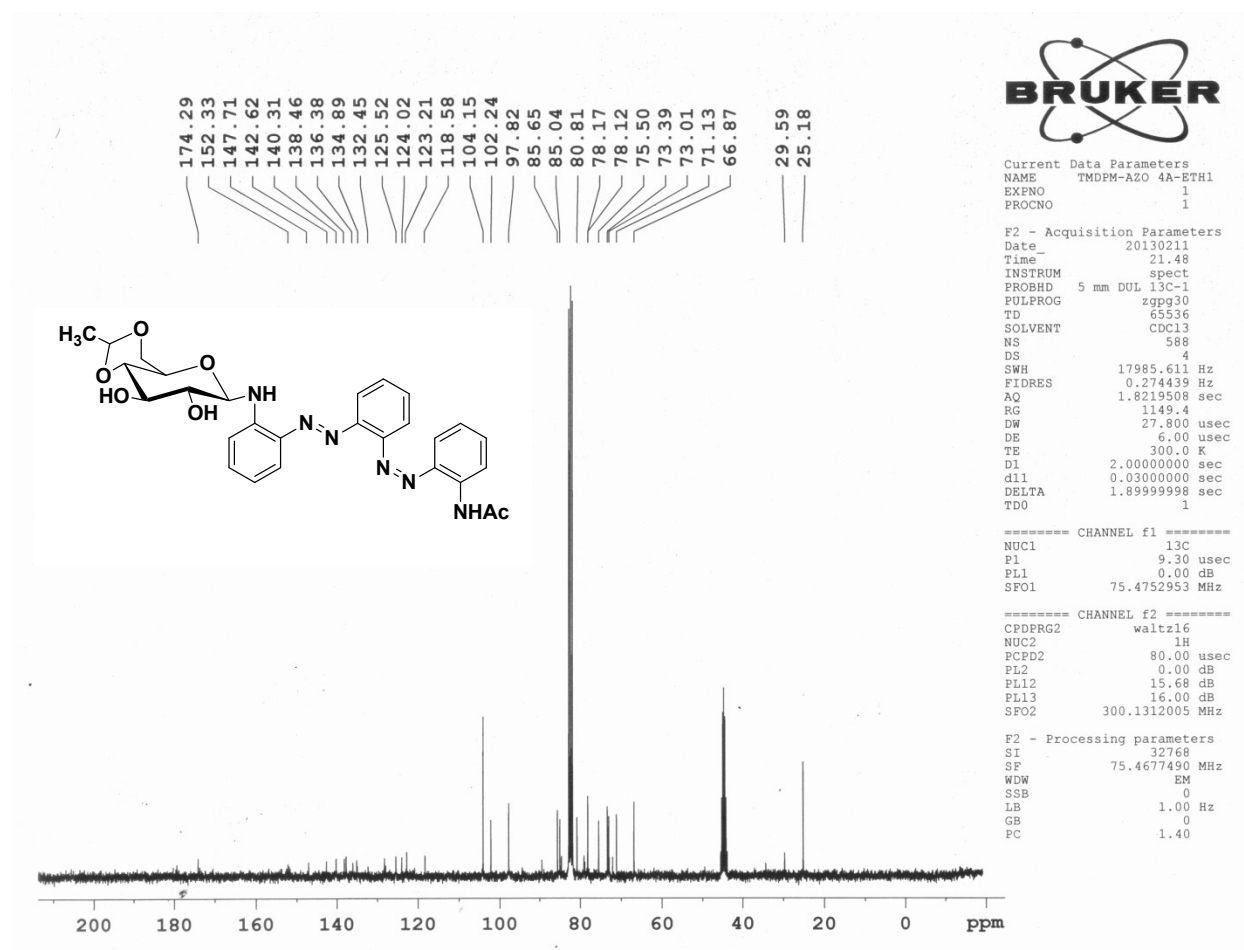

**Figure S24.  $^1\text{H}$  NMR Spectrum of compound 15( $\text{CDCl}_3$ (0.6mL) +DMSO-  $\text{d}_6$  (0.1mL), 75MHz)**

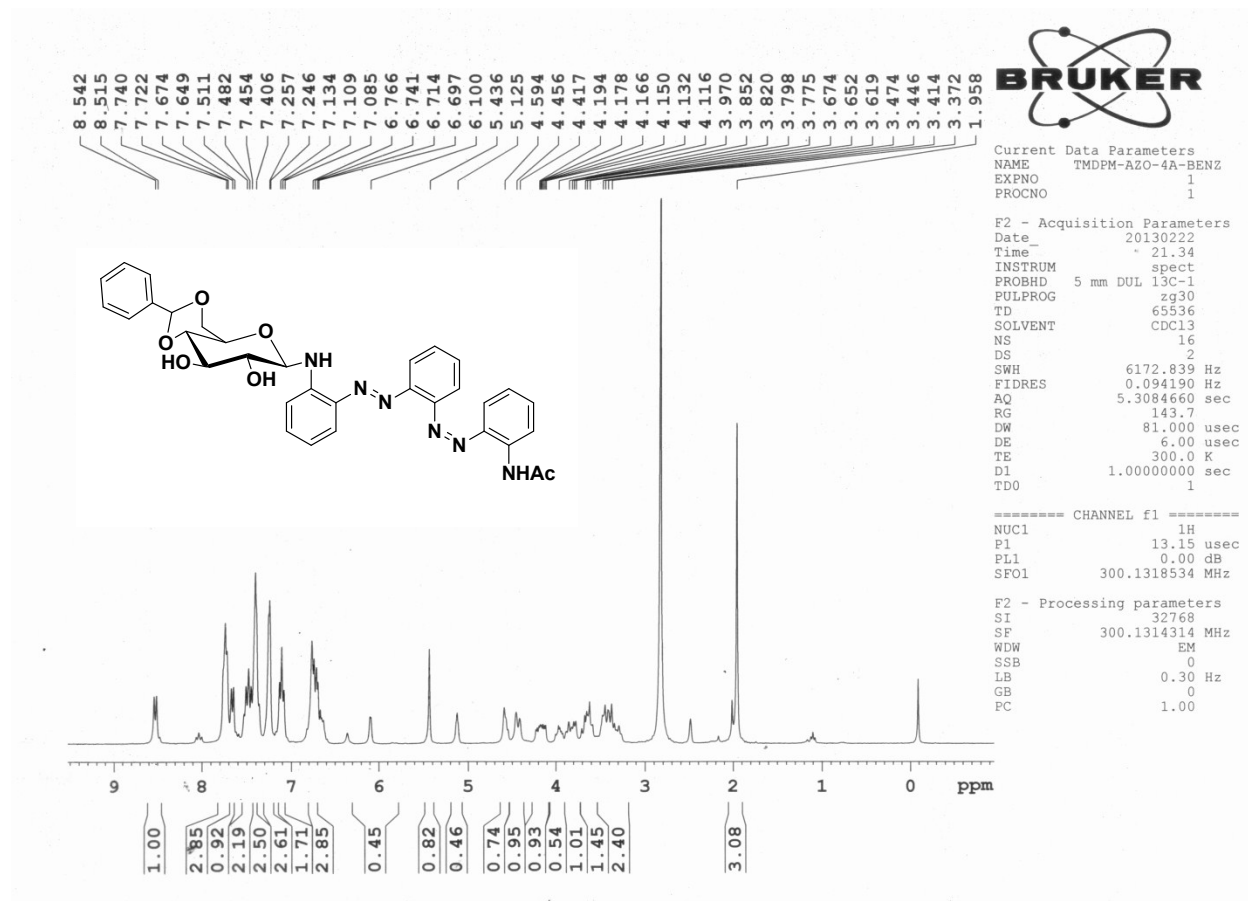

**Figure S25.  $^{13}\text{C}$  NMR Spectrum of compound 15 ( $\text{CDCl}_3(0.6\text{mL})$  DMSO-  $\text{d}_6$  (0.1mL), 75MHz)**

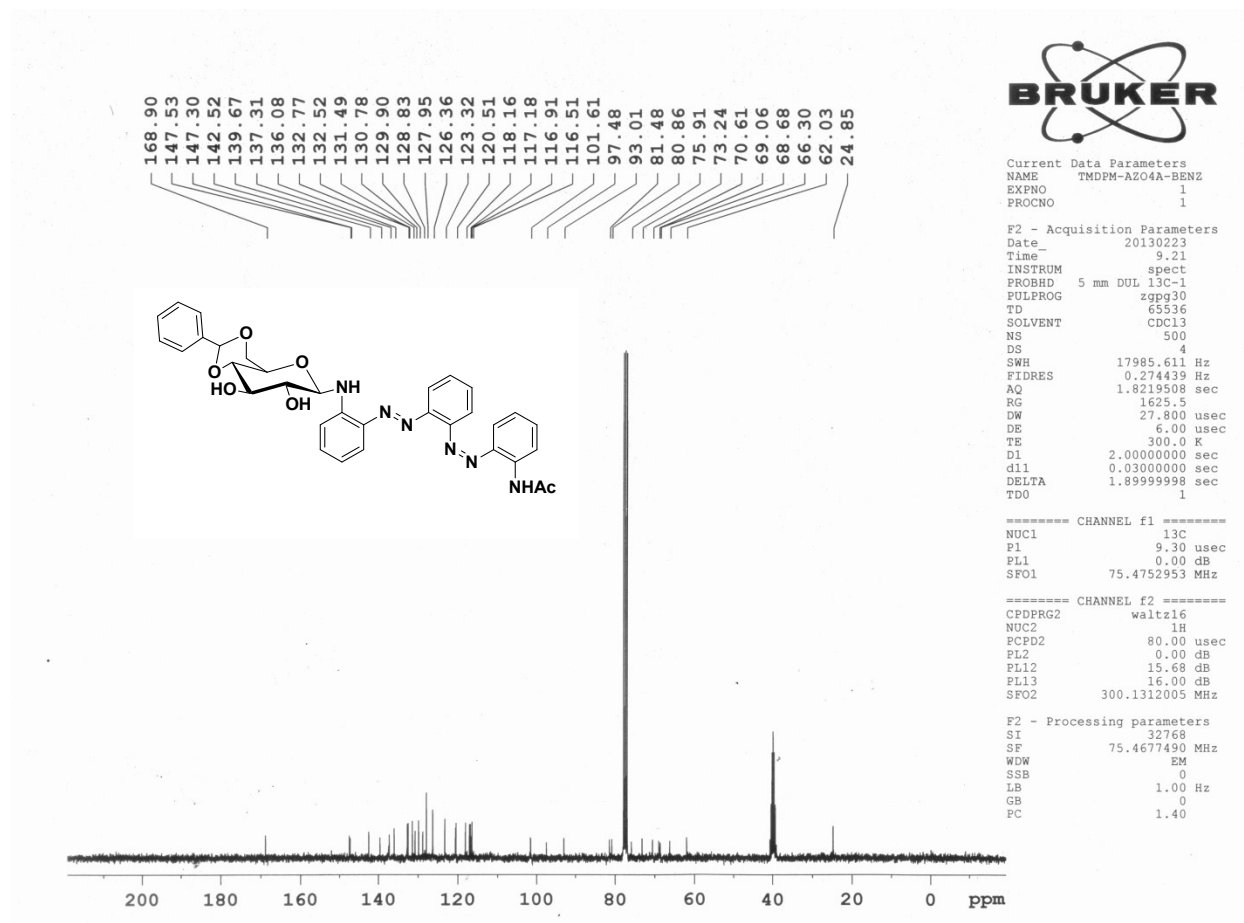

Supplement: RA-009-C9RA08033C-s001 [file RA-009-C9RA08033C-s001.pdf]
